# **Transcription factor retention through multiple polyploidisation steps in wheat**

**Catherine EB Evans<sup>1,2</sup>, Ramesh Arunkumar<sup>1</sup>, Philippa Borrill<sup>1</sup>**

<sup>1</sup> Department of Crop Genetics, John Innes Centre, Norwich Research Park, NR4 7UH, UK

<sup>2</sup> School of Biosciences, University of Birmingham, Birmingham, B15 2TT, UK

Author for correspondence:

Philippa Borrill, Tel: +44 (0)1603 450533, Email: [philippa.borrill@jic.ac.uk](mailto:philippa.borrill@jic.ac.uk)

Total word count for the main body of the text (excluding summary, references and legends): 5,883 words

Summary: 199 words

Introduction: 874 words

Materials and Methods: 1,699 words

Results: 1,981 words

Discussion: 1,324 words

Colour figures: 4

Supplemental Figures: 8

Supplemental Tables: 4

## 1 Summary

- 2 • Whole genome duplication (WGD) is widespread in plant evolutionary history, but the  
3 mechanisms of non-random gene loss after WGD are debated. The gene balance hypothesis  
4 proposes that dosage-sensitive genes such as regulatory genes are retained in polyploids. To  
5 test this hypothesis, we analysed the retention of transcription factors (TFs) in the recent  
6 allohexaploid bread wheat (*Triticum aestivum*).
- 7 • We annotated TFs in hexaploid, tetraploid and diploid wheats; compared the co-expression of  
8 homoeologous TF and non-TF triads; and analysed single nucleotide variation in TFs across  
9 cultivars.
- 10 • We found that, following each of two hybridisation and WGD events, the proportion of TFs  
11 in the genome increased. TFs were preferentially retained over other genes as homoeologous  
12 groups in tetraploid and hexaploid wheat. Across cultivars, TF triads contain fewer  
13 deleterious missense mutations than non-TFs.
- 14 • TFs are preferentially retained as three functional homoeologs in hexaploid wheat, in support  
15 of the gene balance hypothesis. High co-expression between TF homoeologs suggests that  
16 neo- and sub-functionalisation are not major drivers of TF retention in this young polyploid.  
17 Knocking out one TF homoeolog to alter gene dosage, using TILLING or CRISPR, could be  
18 a way to further test the gene balance hypothesis and generate new phenotypes for wheat  
19 breeding.

## 21 Keywords

22 Transcription factors, evolution, polyploidy, *Triticum aestivum* L. (wheat), gene balance hypothesis

## 24 Introduction

25 Gene duplication plays a major role in the evolution of genetic and phenotypic diversity and in  
26 speciation events in eukaryotes (Lynch & Conery, 2000; Van de Peer *et al.*, 2009b). Ancient whole  
27 genome duplications (WGD) are observed throughout the angiosperm plant phylogeny and occurred  
28 at the base of major clades such as the seed plants, core eudicots and monocots (Van de Peer *et al.*,  
29 2009a; Tasdighian *et al.*, 2017). Following WGD, most gene duplicates are eventually lost from the  
30 genome by pseudogenisation or deletion over the course of millions of years (Freeling, 2009),  
31 although the retention of a significant portion of duplicates has been observed across multiple plant  
32 lineages (Lloyd *et al.*, 2014; Li *et al.*, 2016).

33 Several explanations for the retention of gene duplicates have been proposed including selection for  
34 genetic redundancy (or genetic buffering) where effects of a null mutation are compensated by the

35 presence of an intact duplicate copy (Nowak *et al.*, 1997) and gene dosage increase where increased  
36 dosage is advantageous, for example by increasing flux through a pathway (Ohno, 1970). Other  
37 mechanisms include sub-functionalisation of the duplicate copies which may be mediated by  
38 complementary degenerative mutations in each copy (Force *et al.*, 1999) and paralog interference  
39 where degenerative mutations in one duplicate copy interfere with the function of the other copy  
40 thereby promoting the retention of both functional copies (Baker *et al.*, 2013). Duplicate gene copies  
41 may also be retained if they evolve new and distinct functions through neo-functionalisation (Ohno,  
42 1970).

43 An alternative model for duplicate retention is the gene balance hypothesis, which proposes that  
44 dosage sensitive genes tend to be retained as duplicates (Birchler *et al.*, 2005; Birchler & Veitia,  
45 2007). This hypothesis explains the observation that the loss of genes after WGD is non-random and  
46 certain classes of gene are preferentially retained including genes involved in regulatory interactions  
47 or in protein complexes which are dosage sensitive (Blanc & Wolfe, 2004). Conversely, these dosage  
48 sensitive genes are less frequently found in segmental duplications in which they would upset the  
49 dosage balance with interacting partners (Maere *et al.*, 2005), in contrast to WGD where their  
50 interacting partners would also be duplicated.

51 Studies across multiple angiosperms have revealed that transcription factors (TFs), a major type of  
52 dosage sensitive regulatory gene, tend to be retained as duplicates after WGD for millions of years  
53 (Lloyd *et al.*, 2014; Li *et al.*, 2016). In a comparative study of 37 sequenced angiosperm genomes, Li  
54 *et al.* (2016) found that duplicate genes that originated at the Cretaceous-Paleogene boundary ~50 to  
55 70 million years ago (mya) when a large number of WGD events occurred (Van de Peer *et al.*, 2009a),  
56 were enriched for TFs. However these angiosperm-wide studies focussed on relatively old WGD  
57 events >5mya, whilst more recent WGD events which have occurred in individual lineages and are  
58 found in several major crop species are less well studied, perhaps due to a lack of genome sequences.  
59 Preferential retention of dosage sensitive genes such as TFs has been observed in the young polyploid  
60 *Tragopogon miscellus* which underwent WGD only ~80 years before (Buggs *et al.*, 2012). This study  
61 used a limited number of loci, therefore there remains a need to understand the effects of recent (<5  
62 mya) WGD at a genome-wide scale. The recent publication of the wheat genome sequence (IWGSC  
63 *et al.*, 2018) provides an opportunity to examine the retention of dosage-sensitive genes from more  
64 recent WGDs.

65 Hexaploid bread wheat evolved from two hybridisation and WGD events: allotetraploid wild emmer  
66 wheat (*Triticum turgidum* ssp. *dicoccoides*) was formed approximately 0.4 mya when the A genome  
67 progenitor *Triticum urartu* hybridised with the B genome progenitor species (Feldman & Levy, 2012).  
68 The allotetraploid emmer was domesticated and hybridised with the D genome progenitor *Aegilops*  
69 *tauschii* approximately 10,000 years ago to form hexaploid bread wheat (*Triticum aestivum* L.)

70 (Dubcovsky & Dvorak, 2007). This two-step recent history of WGD events has resulted in >50% of  
71 genes being present with three homoeologous copies in bread wheat (IWGSC *et al.*, 2018). Previous  
72 studies in wheat have shown that 58% of NAC TFs and 63% of MIKC-type MADS-box TFs have  
73 three homoeologs (Borrill *et al.*, 2017; Schilling *et al.*, 2020), but a systematic study has not been  
74 carried out to establish whether the preferential retention of TFs is observed across all TF families in  
75 this recent polyploidy.

76 In this study we investigated whether these two recent WGD events resulted in the preferential  
77 retention of TFs in hexaploid wheat, as would be predicted by the gene balance hypothesis. Using the  
78 extensive curated expression data available for wheat, we explored alternative hypotheses about TF  
79 retention, such as sub- or neo-functionalisation, based on expression patterns. Moreover, since genetic  
80 variation in several TFs has been instrumental in wheat adaptation during domestication including the  
81 free-threshing gene *Q* (Simons *et al.*, 2006) and the vernalisation gene *VRN1* (Yan *et al.*, 2003), we  
82 examined the natural variation in TF homoeologs observed in wheat. Specifically we examined the  
83 propensity of wheat TFs to be retained as functional copies without deleterious mutations at a  
84 population level. Hence our study addresses not only an evolutionary question about the retention of  
85 TFs in young polyploids, but also provides insight into TF expression diversity and genetic variation  
86 which lays a foundation for future research and breeding.

87

## 88 **Materials and Methods**

### 89 **Annotation of TFs in wheat and progenitor species**

90 Peptide sequences for genes in the RefSeqv1.1 gene annotation of *Triticum aestivum* cv. Chinese  
91 Spring (IWGSC *et al.*, 2018) were downloaded from EnsemblPlants (Howe *et al.*, 2020). The file was  
92 divided into three parts to contain <50,000 sequences per file and TFs were annotated in each file  
93 using iTAK online v1.6 (Zheng *et al.*, 2016). In cases where different transcript isoforms were  
94 assigned to different TF families (23 out of 6,128 genes) the family assigned to the longer transcript  
95 isoform was retained (Table S1). Peptide sequences for genes in the *Aegilops tauschii* assembly (Luo  
96 *et al.*, 2017) were downloaded from EnsemblPlants, divided into six smaller files and annotated using  
97 iTAK online v1.6. Again, when different transcript isoforms were assigned to different TF families  
98 (186 out of 2,120 genes) the family assigned to the longer transcript isoform was retained (Table S2).  
99 In general, discrepancies between TF families were due to one isoform being truncated, with the  
100 truncated isoform lacking a protein domain that allowed a more specific TF family to be assigned to  
101 the longer isoform. Coding sequences for the longest isoforms of genes in the *Triticum urartu* genome  
102 (Ling *et al.*, 2018) were downloaded from <http://www.mbkbase.org/Tu/> and annotated using iTAK  
103 online v1.6 (Table S3). TF annotations for *Triticum turgidum* ssp. *dicoccoides* cv. Zavitan (Avni *et*  
104 *al.*, 2017) were downloaded from the iTAK database (update 18.12) (Zheng *et al.*, 2016) (Table S4).

## 105 **Identification of 1:1:1 triads in hexaploid and 1:1 diads in tetraploid wheat**

106 Homoeologs were downloaded from EnsemblPlants Biomart for the RefSeqv1.1 gene annotation  
107 using only high confidence gene models. Only one2one homoeologs (assigned by EnsemblPlants)  
108 were retained. There were 20,393 triads corresponding to 61,179 genes (56.7% of genes) (Table S1).  
109 Homoeologs in *T. turgidum* ssp. *dicoccoides* were obtained from Avni *et al.* (2017) and filtered to  
110 only retain 1:1 homoeologs by removing “singleton” and “hit2homolog” (i.e. paralog) groups (Table  
111 S4). Only high confidence genes from the RefSeqv1.1 annotation were used in all subsequent  
112 analyses.

## 113 **Adjusting for the effect of gene loss in tetraploid wheat on hexaploid wheat triad** 114 **numbers per TF family**

115 In order to adjust for the differences in triad proportions between TF families observed in hexaploid  
116 due to the varying proportions in diads in tetraploid wheat, we calculated the normalised percentage  
117 of genes in triads:

$$118 \quad \text{Normalised percentage of genes in triads} = \frac{\% \text{ of genes in triads in hexaploid wheat}}{\% \text{ of genes in diads in that TF family}}$$

119 For example if 60% of genes were in triads in hexaploid, but only 80% genes were in diads in  
120 tetraploid, the normalised value will be 75% - i.e. 75% of the potential triads were formed because we  
121 have accounted for the 20% which were already missing in tetraploid.

## 122 **Correlation of expression levels per family to homoeolog retention in triads**

123 To measure the gene expression level of each TF family we used RNA-seq data from 15 different  
124 tissues and developmental stages from Chinese Spring (Choulet *et al.*, 2014). These included tissues  
125 from seedling roots and shoots through to grain 30 days after anthesis. We downloaded gene  
126 expression data in transcripts per million (tpm) for this dataset from expVIP ([www.wheat-](http://www.wheat-expression.com)  
127 [expression.com](http://www.wheat-expression.com)) (Borrill *et al.*, 2016; Ramírez-González *et al.*, 2018). We calculated the mean  
128 expression level for each gene across the 15 tissues, and then calculated the median expression level  
129 for each TF family. We fitted a linear regression model between log(median expression level per TF  
130 family) and the percentage of TFs in triads in the family.

## 131 **Correlation of tandem duplication per family to homoeolog retention in triads**

132 For all TF genes we defined tandem duplicates as genes which were adjacent in the genome assembly  
133 according to their gene IDs  $\pm 3$  genes in either direction (gene IDs increase by 100 for adjacent genes  
134 in this genome assembly). We allowed 1 or 2 genes between tandem duplicates because a tandem  
135 duplication event may have occurred capturing a TF and non-TF in the same duplication event. Each  
136 nearby duplicate was counted as one tandem duplication event (i.e. a cluster of 3 TF genes would be  
137 counted as 2 tandem duplication events), and the total number of tandem duplication events was

138 divided by the total number of genes in each TF family to calculate the percentage of tandem  
139 duplicated genes per TF family. We fitted a linear regression model between the percentage of genes  
140 which are tandem duplicates per TF family and the percentage of TFs in triads in the family. We  
141 repeated our analysis only considering  $\pm 2$  genes (with one gene between them) or  $\pm 1$  gene (with no  
142 gene between them) as tandem duplicates.

### 143 **Calculation of homoeolog similarity of expression per family**

144 Using the same data from 15 different tissues and developmental stages from Chinese Spring we  
145 filtered to only keep triads where at least 1 homoeolog was expressed  $>0.5$  tpm in one tissue  
146 (calculated as the mean value of two biological replicates). To account for differences in expression  
147 level between TFs and non-TFs, we normalised the expression level of each triad per tissue to sum to  
148 1 as in Ramírez-González *et al.* (2018) before calculating the standard deviation of expression level  
149 between homoeologs. For 58 out of 19,391 triads (0.3%) the TF family was inconsistent between  
150 homoeologs (e.g. MYB and MYB-related) so the family assigned to two of the three homoeologs was  
151 retained. A Mann-Whitney test was used to determine whether the standard deviation within TF triads  
152 was different from non-TF triads for each tissue.

### 153 **Calculation of homoeolog co-expression per family**

154 To calculate the Pearson's correlation between the three homoeologs we used the same data from 15  
155 different tissues and developmental stages from Chinese Spring. We filtered to only keep triads where  
156 at least 1 homoeolog was expressed  $>0.5$  tpm in one tissue (calculated as the mean value of two  
157 biological replicates), and triads where all three homoeologs were expressed (tpm $>0$  in at least one  
158 tissue). The Pearson's correlation was calculated between homoeologs within a triad in a pairwise  
159 fashion (A vs B, B vs D, A vs D) and the three correlations were plotted for each triad. To calculate  
160 the median Pearson's correlation for TF triads and non-TF triads, the Pearson's correlation values  
161 were Z transformed using DescTools v0.99.44 (Signorell, 2021) before obtaining the median, then  
162 back-transformed to reduce bias (Corey *et al.*, 1998).

163 As an alternative measure of co-expression we used information about module assignment from a  
164 Weight Gene Co-expression Network Analysis (WGCNA) across 850 wheat RNA-samples  
165 (Langfelder & Horvath, 2008; Ramírez-González *et al.*, 2018). The co-expression network was built  
166 using RefSeq v1.0 annotation. To enable compatibility with our TF annotation which was carried out  
167 using RefSeq v1.1 annotation, only genes which were 99% identical with  $>90\%$  coverage from v1.0  
168 to v1.1 were included in this analysis. To calculate the percentage of triads with homoeologs in the  
169 same module only triads in which all three homoeologs had a module assigned, excluding module 0,  
170 were considered. Module 0 largely contains genes with invariable expression patterns between  
171 samples (Ramírez-González *et al.*, 2018).

## 172 **Analysis of SNP variation data**

173 To investigate the types of single nucleotide polymorphisms (SNPs) in wheat TFs, we used exome  
174 capture data of 811 hexaploid wheat landraces and cultivars representing global genetic diversity (He  
175 *et al.*, 2019). Filtered and imputed SNPs (~3 million) were downloaded May 2021 from  
176 <http://wheatgenomics.plantpath.ksu.edu/1000EC/>.

177 We selected SNPs in genes in triads and used the Ensembl Variant Effect Predictor (VEP v99.2) to  
178 predict the effect of SNPs on these genes (McLaren *et al.*, 2016). From an input of 529,066 SNPs in  
179 triad genes, VEP output 1,146,195 SNP effects. We selected 216,285 SNPs predicted in the coding  
180 sequence of the canonical transcript of a triad gene. Using R, we filtered to exclude: SNPs which were  
181 also splice region variants; missense variants without SIFT scores; and SNPs with >25% missing  
182 calls. 210,578 SNPs remained (97% of unfiltered SNPs in coding sequences of canonical transcripts).

183 To exclude potential bias from rare SNPs, we filtered to retain SNPs with a minor allele frequency  
184 (MAF) of at least 0.01, resulting in a total of 74,442 SNPs. To focus on SNPs more likely to have a  
185 functional effect *in planta*, we only retained SNPs in genes that were expressed at >0.5 tpm in at least  
186 one tissue using data from (Choulet *et al.*, 2014). We excluded SNPs in regions that He *et al.* (2019)  
187 identified as being under environmental adaptation, improvement selection or within a selective  
188 sweep, as positive and purifying selection have similar impacts on nucleotide diversities in  
189 populations (Cvijovic *et al.*, 2018). Introgressed sites were also excluded as they would have had a  
190 different demographic history compared to the remainder of the genome. Synonymous sites that had  
191 more than one annotation were excluded from analyses. This left 16,119 SNPs (1020 TF, 15,099 non-  
192 TF).

193 We categorised the SNPs according to variant effect (stop gained, missense and synonymous).  
194 Missense mutations were further categorised as deleterious or tolerated according to their Sorting  
195 Intolerant from Tolerant (SIFT) prediction (Sim *et al.*, 2012). A SIFT score of  $\leq 0.05$  is predicted to be  
196 deleterious, affecting the protein phenotype and a score  $> 0.05$  is predicted to be tolerated, not  
197 affecting phenotype.

198 Per site nucleotide diversity was estimated using VCFtools c0.1.16 (Danecek *et al.*, 2011). Mann-  
199 Whitney tests were used to compare the TF and non-TF nucleotide site diversity distributions.  
200 Mutation load was estimated by calculating the number of homozygous alternate alleles for each site  
201 type, divided by the summed lengths of all the canonical transcripts for TFs and non-TFs separately.  
202 A linear regression with mutation load as the response and the category of sites (stop gained,  
203 deleterious missense, tolerated missense, synonymous) and the group of genes (TF and non-TF) was  
204 fitted, and an ANOVA was performed to test for the significance of the fixed effects. Further, a  
205 Tukey's test was used to compare TFs and non-TFs for each site category. Individuals with extreme  
206 mutation loads were classed as those with loads in the 2.5% tails in any of the distributions. For the

207 TF families plot, we excluded SNPs which are only represented in individuals with extreme mutation  
208 loads. We plotted the proportion of SNPs by variant effect for TF families containing more than 10  
209 triads and  $\geq 5$  SNPs and for non-TFs.

210

## 211 **Results**

### 212 **TFs homoeologs are retained across polyploidisation events more frequently than non-** 213 **TFs**

214 To explore TF evolution and conservation in polyploid wheat we annotated TFs in the hexaploid *T.*  
215 *aestivum* (AABBDD), the tetraploid ancestor *T. turgidum* ssp. *dicoccoides* (AABB) and the diploid  
216 ancestral species *T. urartu* (AA) and *A. tauschii* (DD) (Table S1-4). We found that overall the  
217 percentage of genes in the genome which were annotated as TFs increased as the ploidy level  
218 increased (Figure 1a), from 4.4% in diploid *T. urartu*, to 4.9% in tetraploid *T. turgidum* ssp  
219 *dicoccoides*, to 5.7% in hexaploid *T. aestivum*. A higher percentage of genes were TFs in *A. tauschii*  
220 (5.4%) than in the other diploid progenitor *T. urartu* (4.4%), although this was still lower than in the  
221 hexaploid wheat (5.7%). This supports the hypothesis that TFs are preferentially retained, compared  
222 to other types of genes, in polyploid wheat. The retained TFs were distributed similarly across the  
223 genomes in tetraploid (50.4% on A genome, 49.6% on B genome) and hexaploid wheat (33.7% on A  
224 genome, 33.1% on B genome and 33.3% on D genome), consistent with previous reports that wheat  
225 does not show biased sub-genome fractionation associated with preferential loss of genes associated  
226 with one subgenome (IWGSC, 2014).



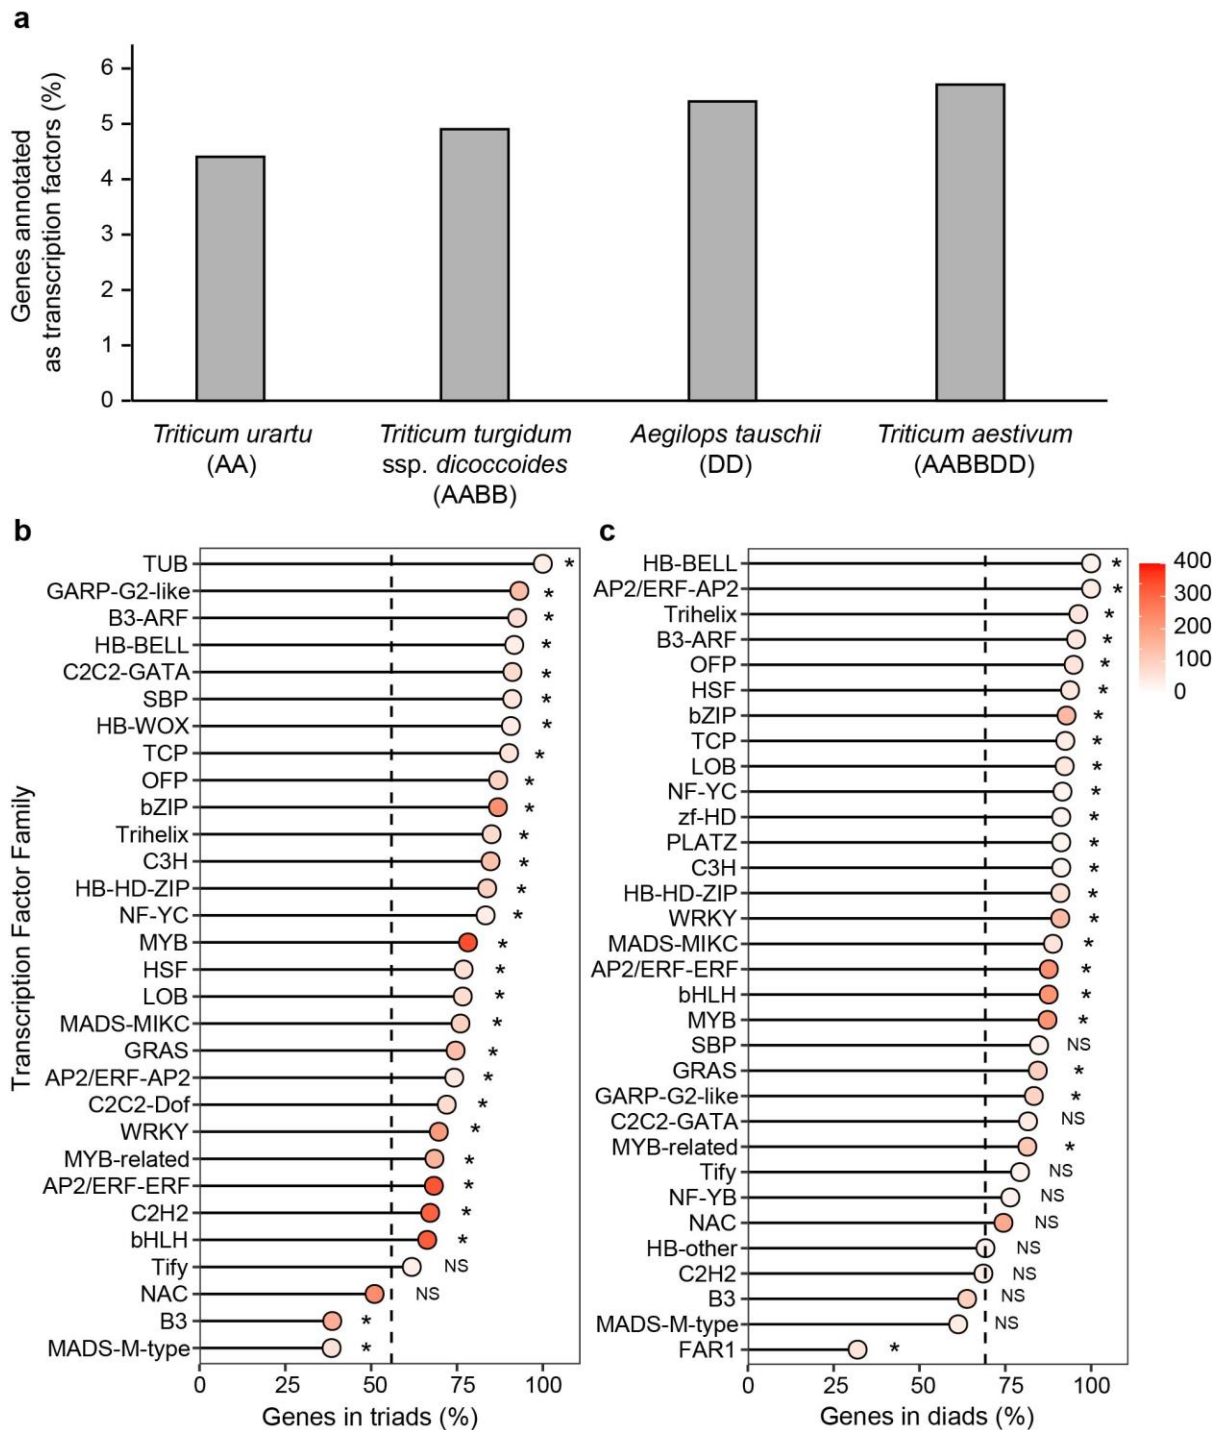

227

228 **Figure 1.** Transcription factor (TF) genes in *T. aestivum* and ancestral species. a) Percentage of genes  
 229 annotated as TFs in hexaploid *T. aestivum* and the tetraploid and diploid ancestral species. b)  
 230 Percentage of genes in triads in *T. aestivum* TF families with >10 triads and c) Percentage of genes in  
 231 diads in *T. turgidum* ssp. *dicoccoides* TF families with >10 diads. In b) and c) the dotted black line  
 232 indicates the mean value for non-transcription factors and asterisks (\*) denote families which are  
 233 significantly different from non-TFs (Fisher's exact test,  $p < 0.05$ , FDR corrected for multiple testing).  
 234 NS= non-significant. The fill colour of the dots indicates the number of genes in the TF family.  
 235

236 We hypothesised that the higher proportion of TF genes in polyploid wheats compared to their wheat  
237 progenitors were due to the preferential retention of TF homoeologs, whilst other types of genes were  
238 less often retained with all homoeologs. Consistent with this hypothesis we found that in polyploid  
239 wheat, TFs were more frequently present with all homoeologs than other types of genes. Across TF  
240 and non-TF genes in hexaploid *T. aestivum*, 56.7% of genes are in triads with a single A homoeolog, a  
241 single B homoeolog and a single D homoeolog. TF genes were more commonly found in triads with  
242 70.5% of TFs in triads, compared to other types of genes (55.9% in triads;  $p < 0.001$ , Fisher's exact  
243 test). This enrichment for triads was observed in nearly all TF families (Fig 1b, Fig S1). Similar trends  
244 were observed in tetraploid *T. turgidum* ssp. *dicoccoides*. Across TF and non-TF genes 69.8% of  
245 genes in the tetraploid were in diads with a single A homoeolog and a single B homoeolog, but this  
246 figure rose to 82.5% of TFs, compared to 69.2% of other types of genes ( $p < 0.001$ , Fisher's exact test).  
247 The enrichment for diads was common to most TF families (Figure 1c, Fig S2).

248 In general, TF families with a lower percentage of triads in hexaploid wheat already had a lower  
249 proportion of diads in tetraploid. For example, the B3 and MADS-M-type families had fewer  
250 triads/diads in both wheat species than non-TF genes, with tetraploid having 63.9% and 61.3% of  
251 genes for the B3 and MADS-M-type family in diads respectively, and hexaploid having 38.7% and  
252 38.5% of genes in triads respectively (Figure 1b and 1c). The NAC TF family, which is one of the  
253 largest TF families in wheat, is one of the less well retained TF families in tetraploid (74.5% of genes  
254 in diads), although this is still higher than for non-TFs. However, in hexaploid wheat only 51.0% of  
255 NACs are in triads which is lower than for non-TFs. After accounting for gene loss in tetraploid  
256 wheat, the B3, MADS-M-type and NAC families in hexaploid wheat still had significantly fewer  
257 genes in triads (60.5%, 62.8% and 68.5% respectively) than non-TFs (80.8%; FDR adjusted  $p < 0.001$   
258 Fisher's exact test). This indicates that homoeolog loss in specific TF families occurred across both  
259 polyploidisation steps and was not solely due to pre-existing gene loss in the tetraploid.

## 260 **Differential conservation of TF families as triads is correlated with expression level and** 261 **tandem duplications**

262 To understand why certain TF families are more prone to homoeolog loss we explored two previously  
263 proposed hypotheses. The first is the “highly expressed gene retention idea” (Freeling, 2009), which  
264 proposes that gene families which are highly expressed are more likely to be retained with  
265 homoeologous copies. Secondly we investigated the “balanced gene drive hypothesis” (Freeling,  
266 2009) which proposes that gene families which have more tandem duplications are less likely to be  
267 retained with homoeologous copies.

268 To test the correlation between gene expression level and gene retention in hexaploid wheat we used  
269 RNA-seq data from 15 different tissues from Chinese Spring from a developmental timecourse  
270 (Choulet *et al.*, 2014). We calculated the mean expression level for each gene across the 15 tissues,

271 and then calculated the median expression level for each TF family. Focussing on TF families with  
272 >10 triads we found a significant positive correlation between the expression level of the TF family  
273 and the percentage of genes in the TF family which are in triads ( $R^2 = 0.40$ ,  $p < 0.001$ ; Figure 2a). This  
274 relationship also held across all TF families regardless of size, although the correlation was weaker  
275 due to small families that were outliers ( $R^2 = 0.21$ ,  $p < 0.001$ ; Fig S3). Consistent with this relationship,  
276 the three TF families with a lower retention of homoeologs in hexaploid wheat than non-TFs (NAC,  
277 MADS-M-type and B3) all had low median expression levels (Figure 2a).

278 We also explored the relationship between tandem duplications and gene retention. Focussing on TF  
279 families with >10 triads we found that the degree of tandem duplication in a TF family was negatively  
280 correlated with the percent of triads within the TF family, consistent with the “balanced gene drive  
281 hypothesis” ( $R^2 = 0.42$ ,  $p < 0.001$ , permitting up to 2 genes between tandem duplicated TFs; Figure  
282 2B). This correlation held with a more stringent criteria for tandem duplicates only permitting 1 gene  
283 between tandem duplicates ( $R^2 = 0.38$ ,  $p < 0.001$ ; Fig S4a) or 0 genes between tandem duplicates ( $R^2 =$   
284  $0.28$ ,  $p = 0.003$ ; Fig S4B). These relationships also held when including all TF families regardless of  
285 size, although the correlation was weaker ( $R^2 = 0.14$  to  $0.22$ ,  $p < 0.003$ ) due to variability within small  
286 families (Fig S4c-e). The NAC TF family that had low retention of homoeologs in hexaploid wheat  
287 had quite high levels of tandem duplication (Figure 2b). However, the MADS-M-type and B3 TF  
288 families had lower levels of tandem duplication than the trendline across all TF families (Figure 2b),  
289 suggesting that low expression levels (Figure 2a) may be driving the lack of homoeolog retention in  
290 these families. Together these results indicate that different retention levels in individual TF families  
291 are associated with gene expression level and the degree of tandem duplication.

292

293

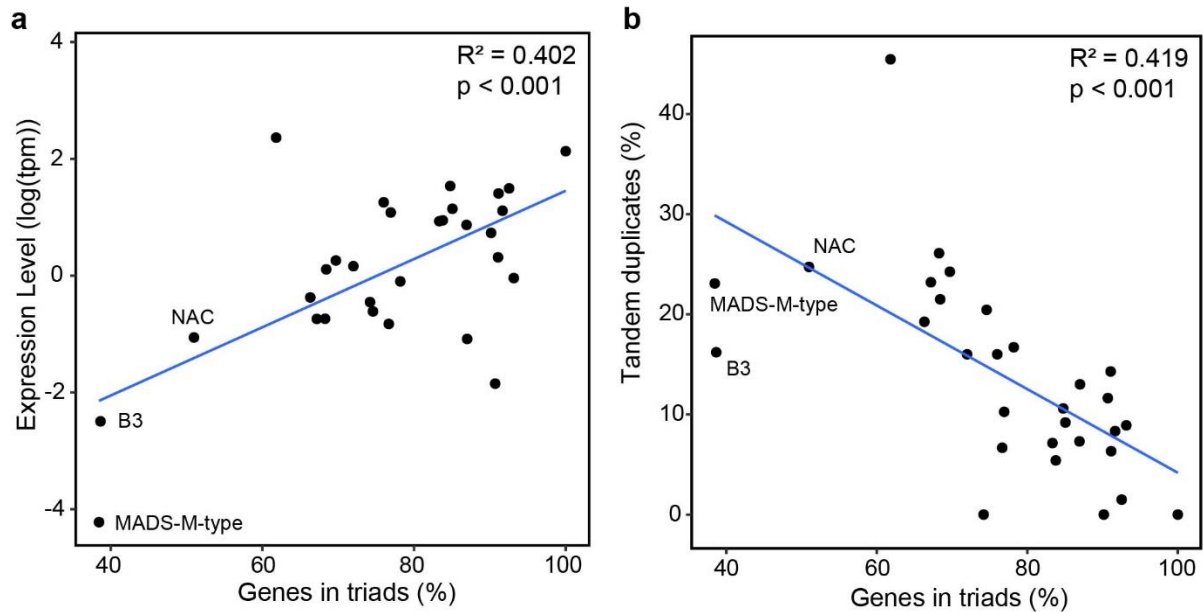

294

295 **Figure 2.** Factors explaining differential retention of homoeologs in different transcription factor (TF)  
296 families. a) Median expression level per TF family plotted against the percentage of the TF family in  
297 triads for TF families with >10 triads. The mean expression level of each gene in transcripts per  
298 million (tpm) was calculated using 15 tissues of Chinese Spring RNA-seq data and these gene level  
299 values were used to calculate median expression level within the TF family. b) The percentage of  
300 tandem duplicated genes within each TF family plotted against the percentage of the TF family in  
301 triads for TF families with >10 triads. TFs were considered to be tandem duplicates when they were  
302 up to  $\pm 3$  genes away from each other (i.e. up to two genes in between duplicates).

303

### 304 **TF triads do not show increased sub- or neo-functionalisation of expression or co-** 305 **expression patterns**

306 There are several different mechanisms which can contribute to the retention of homoeologs  
307 following polyploidisation. Conant *et al.* (2014) proposed a pluralist framework in which dosage  
308 effects, sub-functionalisation and neo-functionalisation interplay to preserve duplicated genes, in a  
309 time dependent manner. Although transcriptomics cannot provide a definitive answer about the  
310 contributions of these different mechanisms (Conant *et al.*, 2014), it can provide a starting point to  
311 understand potential mechanisms operating.

312 First, we used the same RNA-seq samples from 15 tissues from Chinese Spring to test whether TF  
313 triads had more different expression levels between homoeologs than non-TF triads, which would  
314 support sub- or neo-functionalisation of TF homoeologs at the gene expression level leading to TF  
315 retention. We normalised the global expression of each triad so that total expression level of the triad  
316 was 1 as described in (Ramírez-González *et al.*, 2018), to account for differences in expression level  
317 between TFs and non TFs. We found that the standard deviation between the expression levels of

318 homoeologs within TF triads was not significantly different from non-TF triads in 14 out of 15 tissues  
319 (Mann-Whitney test,  $p > 0.05$ ). Only roots at Zadoks stage 39 (flag leaf ligule just visible) had a  
320 significantly lower standard deviation between homoeolog expression levels in TF triads than in non-  
321 TF triads (median 0.093 for TF triads, 0.099 for non-TF triads,  $p = 0.036$ , Mann-Whitney test).  
322 Overall, the standard deviation between homoeolog expression levels was not higher in TFs than non-  
323 TFs in any tissue suggesting that sub- or neo-functionalisation is not occurring at the gene expression  
324 level between TF homoeologs globally.

325 Building upon this finding, we explored co-expression between homoeologs across different tissues.  
326 We calculated the Pearson's correlation coefficient pairwise between homoeologs across the 15  
327 Chinese Spring tissues. Co-expression was higher for TF triads than non-TF triads (Pearson's  
328 correlation coefficient 0.938 vs 0.923,  $p$ -value  $< 0.001$ , Mann-Whitney test). Amongst TF families  
329 with over 10 triads, most TF families showed higher homoeolog co-expression than non-TFs, and the  
330 differences were significant for nine TF families (Figure 3a). Two TF families has significantly lower  
331 homoeolog co-expression than non-TFs (OFP and MADS-M-type, Figure 3a) The trend for higher co-  
332 expression within TF families than non-TFs was also observed in TF families with fewer than 10  
333 triads (Fig S5).

334 As an alternative measure of triad co-expression we explored a previously generated co-expression  
335 network made using WGCNA across 850 wheat RNA-samples (Langfelder & Horvath, 2008;  
336 Ramírez-González *et al.*, 2018). We found that TF homoeologs were more frequently assigned to the  
337 same co-expression module than non-TF homoeologs (35.5% vs 29.3%;  $p < 0.001$  Fisher's exact test),  
338 consistent with our Pearson's correlation approach. A higher level of co-expression in TFs than non-  
339 TFs was consistent across most TF families in this WGCNA based approach although the difference  
340 was only statistically significant in a few families after adjustment for multiple testing (Figure 3b and  
341 Fig S6). TF families which showed higher co-expression were quite consistent with both measures of  
342 co-expression, e.g. Tify and WRKY, whilst some other families such as MADS-M-type TFs had  
343 lower co-expression using both measures (Figure 3). Overall, we did not find support for higher levels  
344 of sub- or neo-functionalisation at the expression or co-expression level in TF triads than in non-TFs,  
345 suggesting that other mechanisms such as dosage may be important for TF retention.

346

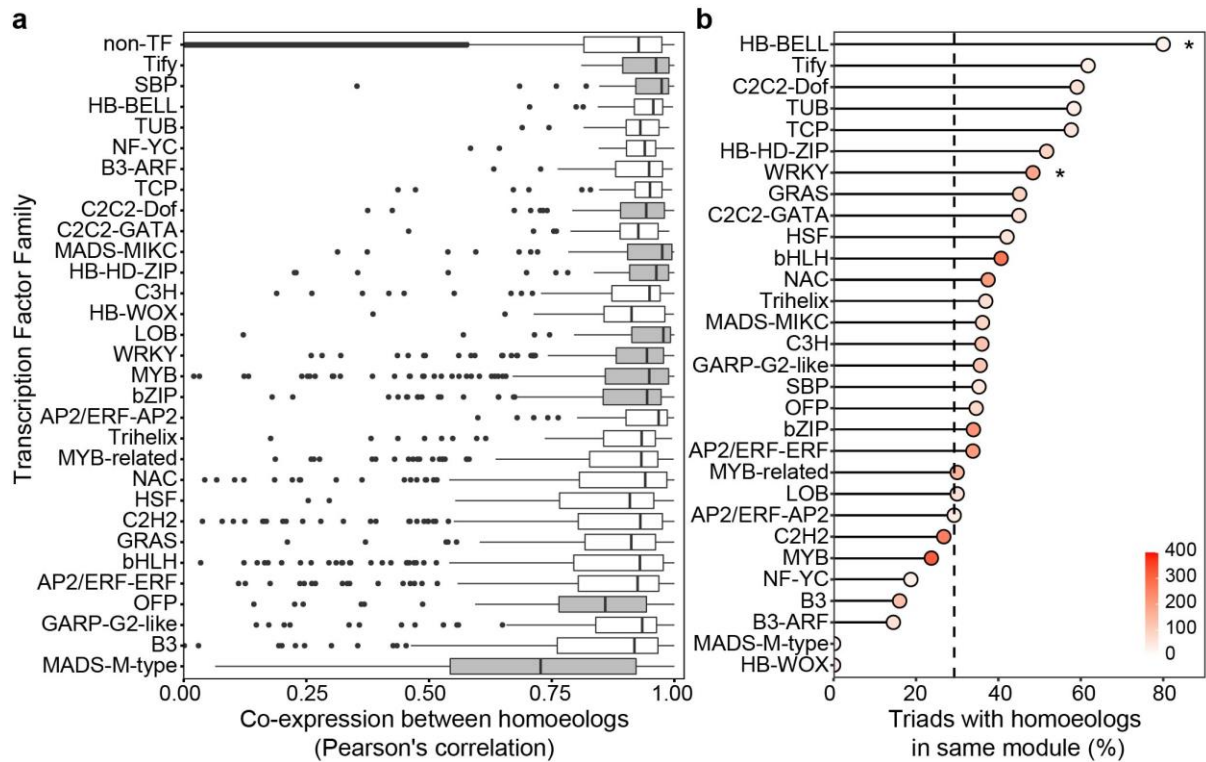

347

348 **Figure 3.** Co-expression of homoeologs within triads in transcription factor (TF) families with >10  
 349 triads. a) Pearson's correlation coefficient between homoeologs across 15 tissues per TF family. TF  
 350 families which were significantly different to non-TFs are highlighted in grey (Mann-Whitney test,  
 351  $p < 0.05$ , FDR corrected for multiple testing). The correlation between non-TF homoeologs is shown in  
 352 the top row. b) Homoeologs in same module in 850 sample WGCNA network per TF family. Black  
 353 dotted line in b) represents mean value of non-TFs and asterisks (\*) denote families which are  
 354 statistically significant different from non-TFs (Fisher's exact test,  $p < 0.05$ , FDR corrected for  
 355 multiple testing). The fill colour of the dots in b) indicates the number of genes in the TF family.  
 356

### 357 **Reduced deleterious mutation load in TF triads compared to non-TFs**

358 To investigate how TFs evolve in wheat populations we explored single nucleotide polymorphisms  
 359 (SNPs) in TFs and non-TFs using an exome capture dataset of 811 diverse hexaploid wheat cultivars  
 360 and landraces (He *et al.*, 2019). We hypothesised that TF triads would accumulate fewer mutations  
 361 deleterious to gene function than non-TF triads, which would be consistent with their preferential  
 362 retention during polyploidisation. We did not observe significant differences in the distribution of  
 363 deleterious or synonymous nucleotide site diversities, estimated using  $\pi$ , between TFs and non-TFs  
 364 (Fig S7).  $\pi$  is low when allele frequency is low or high (Fig S8) and, therefore, it does not capture the  
 365 deleterious load burden in TFs and non-TFs. To identify the mutational burden, we calculated the  
 366 number of homozygous deleterious and synonymous mutations in TF and non-TF triads. Numbers of  
 367 homozygous mutations per individual scaled by the total length of all canonical transcripts differ  
 368 between TF and non-TF genes (ANOVA,  $F=66.5$ ,  $df=1$ ,  $p < 0.001$ ). There were 32.0% fewer  
 369 deleterious missense mutations per kilobase in TFs compared to non-TFs (Figure 4a;  $p < 0.001$ ,  
 370 Tukey's test). Frequencies of homozygous stop gained mutation were not significantly different

371 between TFs and non-TFs. However, only 7 stop gained mutations were detected in TFs making the  
372 comparison underpowered. There were 5.7% more tolerated missense mutations and 17.6% fewer  
373 synonymous mutations per kilobase in TFs compared to non-TF genes. As sites occurring in regions  
374 associated with adaptation, introgression, or domestication were removed, the lower synonymous site  
375 diversity and load in TFs likely reflects background selection.

376 To explore the distribution of SNP effects across TF families, we plotted the proportion of SNPs of  
377 different effects in the coding sequence of TFs in families containing >10 triads and  $\geq 5$  SNPs (Figure  
378 4b). 17 out of 26 TF families had fewer deleterious missense plus stop gained SNPs relative to non-  
379 TFs, while 9 had more. The lowest proportion of deleterious plus stop gained SNPs were found in the  
380 MADS-M-Type (0.0%), TCP (0.0%) and HSF (5.0%) families, and the highest proportion in the  
381 AP2/ERF-AP2 (27.8%), HB-HD-ZIP (21.1%) and C2H2 (21.1%) families. Overall TF families vary  
382 widely in the level of deleterious polymorphism in triads.

383

384

385

386

387

388

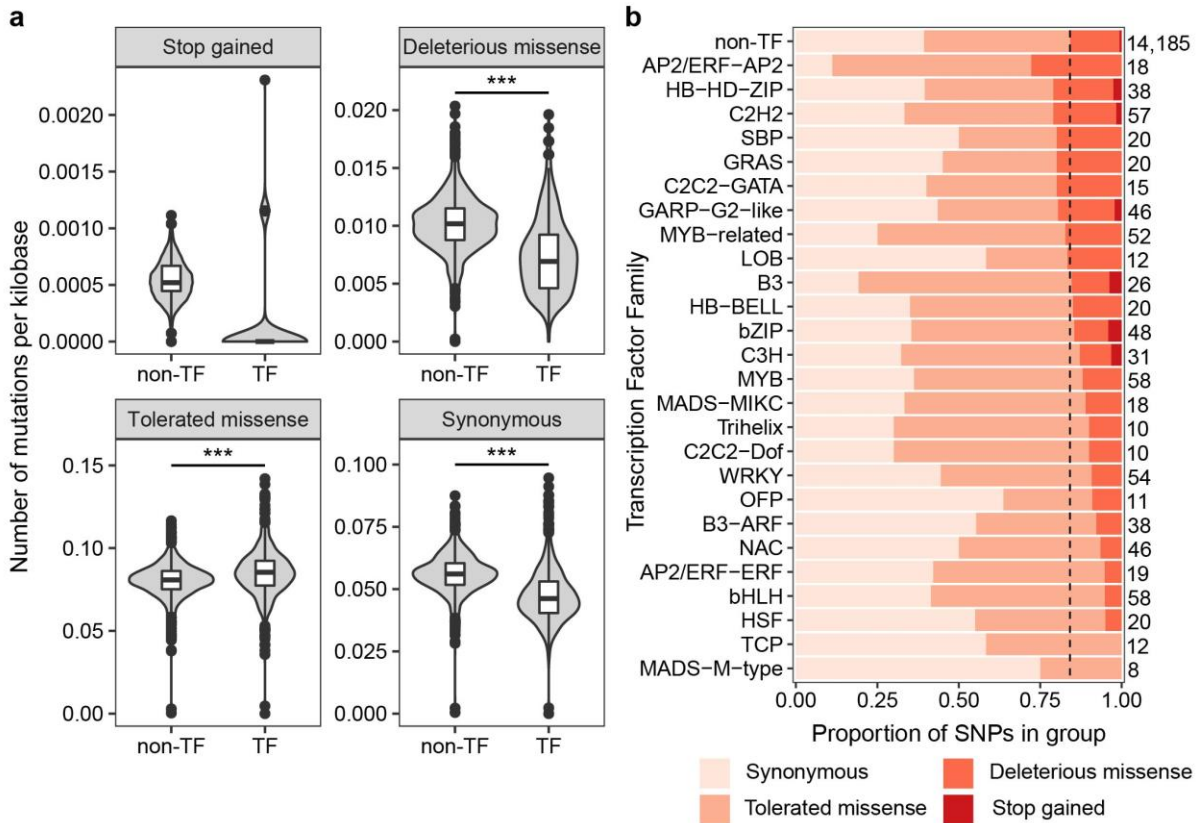

389

390 **Figure 4.** Transcription factors (TFs) accumulate fewer harmful mutations than non-TFs. a)  
 391 Mutational burden in TFs compared to non-TFs for different categories of variants in 811 individuals.  
 392 Mutational burden was calculated as the number of homozygous mutations of each type per individual  
 393 scaled by the total length of all canonical transcripts for TFs and non-TFs. The total number of  
 394 polymorphic sites analysed for TFs and non-TFs were: stop gained (TF = 7, non-TF = 107),  
 395 deleterious missense (TF = 125, non-TF = 2,277), tolerated missense (TF = 474, non-TF = 6,723),  
 396 synonymous (TF = 414, non-TF = 5,989). \*\*\* indicates  $p < 0.001$  following a Tukey's test comparing  
 397 the different classes of variants. b) The proportion of single nucleotide polymorphisms (SNPs) by  
 398 variant effect in TF families containing  $> 10$  triads and  $\geq 5$  SNPs. These SNPs are in genes expressed  
 399 in at least one tissue and have minor allele frequency  $\geq 0.01$ . The number of SNPs in each group is  
 400 shown to the right of the bars. TF families are sorted according to the proportion of deleterious  
 401 missense plus stop gained SNPs, and non-TFs are shown in the top row. The black dotted line  
 402 represents the split between (synonymous + tolerated missense) and (deleterious missense + stop  
 403 gained) SNPs in non-TFs.

404

405

## 406 Discussion

### 407 TF retention is observed in both polyploidisation steps in wheat

408 In this study we found that across recurrent polyploidisation steps, wheat retains TF homoeologs more  
 409 frequently than non-TF homoeologs. This is consistent with previous studies where TF retention was  
 410 observed in both paleopolyploid events ( $>5$  mya) (Li *et al.*, 2016) and neopolyploid events ( $\sim 7,500$  to  
 411 12,500 years ago) (Zhang *et al.*, 2021). Our findings agree with previous work in allotetraploid cotton  
 412 *Gossypium hirsutum*, which formed through hybridisation 1-2 mya (Wendel, 1989), suggesting that



413 TF retention is observed regardless of the time since polyploidisation. Consistent with the gene  
414 balance hypothesis, the degree of retention between different TF families was associated with both  
415 expression level and the degree of tandem duplication, demonstrating that even within a functional  
416 class, this hypothesis can make accurate predictions.

#### 417 **Lack of gene expression support for homoeolog sub- or neo-functionalisation**

418 Using the gene expression data from 15 tissues we found that overall TFs in wheat do not show sub-  
419 or neo-functionalisation at the expression or co-expression level which differs from results in other  
420 species (Liang & Schnable, 2018). For example TF duplicates formed by paleopolyploidisation events  
421 in Arabidopsis during the  $\alpha$ ,  $\beta$  and  $\gamma$  events (all > 15mya) and maize (5-12 mya) tended to have  
422 divergent expression patterns with one copy retaining ancestral expression patterns, whilst the other  
423 diverged in expression patterns (Pophaly & Tellier, 2015; Panchy *et al.*, 2019). In Arabidopsis the  
424 copy with divergent expression tended to have more novel *cis*-regulatory sites, suggesting that neo-  
425 functionalisation might be happening (Panchy *et al.*, 2019). One possible explanation for a lack of  
426 divergence in hexaploid wheat homoeolog expression is that the polyploidisation event is much more  
427 recent than previously studied paleopolyploidisation events. Alternatively this difference may be  
428 because wheat does not show biased genome fractionation (Juery *et al.*, 2021) unlike many other  
429 studied allopolyploid species.

430 Although our global analysis did not show divergent patterns of expression, we found that homoeolog  
431 co-expression levels were variable between TF families. It was previously reported that a subset of  
432 triads which are dynamic in their homoeolog expression between tissues have divergent *cis*-regulation  
433 (Ramírez-González *et al.*, 2018) suggesting that a small number of these changes may already be  
434 occurring in wheat. Given the highly similar expression and co-expression patterns observed in most  
435 TF families, it seems more likely that maintenance of gene dosage underlies TF retention in wheat,  
436 although sub- or neo-functionalisation of homoeolog expression may play a role in homoeolog  
437 retention in TF families that show weaker co-expression. It would require further study to establish  
438 whether *cis*-regulatory changes might explain differences in co-expression between TF families.

#### 439 **Deleterious variation is reduced in TF triads indicating purifying selection**

440 We found that hexaploid wheat TF triads have fewer deleterious missense mutations than non-TF  
441 genes. This could reflect selection against gene loss, selection against neo-functionalisation or both,  
442 i.e. purifying selection for retaining each homoeolog in its original function. Our results are consistent  
443 with Brassica allotetraploids in which TFs were enriched amongst genes without any missense  
444 mutations compared to their diploid ancestors (Zhang *et al.*, 2021). However, this contrasts with  
445 paleopolyploid TF homoeologs in Brassicas which have more frequent missense mutations than other  
446 genes (Zhang *et al.*, 2021). This apparent contradiction could be explained by findings from 37  
447 angiosperm species in which TFs were enriched amongst genes which were retained in duplicate for

448 millions of years after WGD but eventually returned to singleton status (Li *et al.*, 2016). Therefore,  
449 Zhang *et al.* (2021) hypothesised that selection pressure on TFs is dynamic, with a strong purifying  
450 selection for a short period after polyploidisation (hence reduced missense mutations observed in  
451 hexaploid wheat), followed by a period with lower selection pressure once the target genes are lost  
452 through the diploidisation process. Further studies will be needed on polyploids which formed 1-5  
453 million years ago to test this hypothesis.

#### 454 **Differences between TF families**

455 We found that TF families showed quantitative variation in their degree of diad and triad retention,  
456 degree of tandem duplication, co-expression within triads and deleterious SNP variation. While most  
457 TF families fell within a continuum of variation, the MADS-M-type family was an outlier in several  
458 analyses with the lowest percentage of genes in triads (Figure 1b) and exceptionally low co-  
459 expression levels (Figure 3) out of all 30 TF families with >10 triads. Selection to retain MADS-M-  
460 type genes appears to have been weaker than that for other TF families at both polyploidisation steps,  
461 with a gradual decrease from tetraploid to hexaploid wheat. This is consistent with previous reports  
462 that genes in the MADS-M-type family experience a high rate of birth-and-death evolution, weaker  
463 purifying selection and are less conserved between species than MADS-MIKC genes (Nam *et al.*,  
464 2004). Counter-intuitively we found that MADS-M-type triads that are retained, are highly conserved  
465 between wheat cultivars with no stop gained mutations or deleterious missense SNPs. One  
466 explanation for the contradiction of low MADS-M-type retention during polyploidisation but high  
467 conservation within hexaploid wheat cultivars could be due to their role in maintaining speciation  
468 boundaries and importance in plant reproduction (Masiero *et al.*, 2011). Alternatively, the apparent  
469 high level of conservation may be due to the low number of SNPs in the MADS-M-type family  
470 included in our analysis, which is a consequence of the low level of expression of many of these  
471 genes. The MADS-M-type family contrasts strongly with the related MADS-MIKC family which  
472 behaves more similarly to other TF families and is frequently retained as triads, consistent with a  
473 previous study on the MADS-MIKC family (Schilling *et al.*, 2020). While not the focus of this study,  
474 there is also likely to be extensive variation within the non-TF genes which consist of a highly  
475 heterogeneous set of genes for both function and propensity to be retained as triads.

#### 476 **Implications for wheat breeding**

477 In general we found that TF triads are retained in hexaploid wheat and have relatively few deleterious  
478 mutations, consistent with negative consequences to changing TF dosage. However, mutations in TFs  
479 which affect dosage, such as dominant mutations, have been very important in wheat breeding for  
480 their beneficial agronomic effects, for example to adapt flowering time (e.g. *VRN1* and *PPD1* (Yan *et al.*  
481 *et al.*, 2003; Beales *et al.*, 2007)). Therefore, there is the potential to further alter gene dosage of TFs for  
482 agronomic benefit. It has been proposed that TFs with lower co-expression across tissues, termed  
483 dynamic genes (Ramírez-González *et al.*, 2018), have fewer common targets (Harrington *et al.*, 2020)

484 which might release selective pressure to retain all three copies to maintain genetic balance.  
485 Therefore, one promising avenue to influence wheat phenotype by altering TF function would be to  
486 focus on TF triads with high co-expression which are more likely to have stronger phenotypic  
487 consequences if just one copy is removed. Conversely, one could focus on TF triads with low co-  
488 expression because the three homoeologs may have diverged in function, and therefore mutating one  
489 copy might lead to a phenotypic effect due to limited genetic redundancy. The recent developments in  
490 wheat functional genomics such as TILLING and gene editing now make it possible to test the  
491 effectiveness of these strategies (Krasileva *et al.*, 2017; Gao, 2021).

492 Although the possibility to alter the sequence of one homoeolog and induce a phenotypic change in  
493 wheat is attractive, there is evidence that this will not be effective for all TFs. For example *VRN1* null  
494 mutants in a tetraploid background flower much later than wild type plants and single mutants in the  
495 A homoeolog have an intermediate flowering time, however single mutants in the B homoeolog of  
496 *VRN1* do not differ in their flowering time to WT (Chen & Dubcovsky, 2012). A similar lack of  
497 phenotype in a single mutant was observed for *NAM2* mutants which senesce at a similar time to wild  
498 type, whereas null mutants had a significant delay in senescence (Borrill *et al.*, 2019). Therefore, there  
499 will still be a need for detailed functional characterisation of individual TFs, although this could be  
500 guided by predictions informed by the gene balance hypothesis.

501

## 502 **Acknowledgements**

503 This work was supported by the UK Biotechnology and Biological Science Research Council  
504 (BBSRC) through grant BB/T013524/1 and the Designing Future Wheat Institute Strategic  
505 Programme (BB/P016855/1). CEBE received a BBSRC CASE Doctor Training Partnership  
506 studentship in collaboration with RAGT Seeds Ltd (BB/M01116X/1). PB also acknowledges funding  
507 from the Rank Prize New Lecturer Award. This research was also supported by the NBI Research  
508 Computing group through HPC resources and the University of Birmingham's BlueBEAR HPC  
509 resources.

510

## 511 **Author contributions**

512 PB conceived and designed the study with contributions from CEBE and RA. PB wrote the  
513 manuscript with contributions from CEBE and RA. PB carried out transcription factor annotation,  
514 triad/diad identification, tandem duplication and expression analysis. CEBE carried out SNP variant  
515 effect prediction, RA analysed nucleotide site diversity and mutation load, CEBE analysed SNP  
516 distribution in TF families. PB, CEBE and RA prepared figures and supplemental files.

517

518 **Data availability**

519 The data that supports the findings of this study are available in the supplementary material of this  
520 article and from public repositories mentioned in the methods section. Scripts and input files are  
521 available at [https://github.com/Borrill-Lab/TF\\_Triads](https://github.com/Borrill-Lab/TF_Triads).

522

523 **References**

- 524 **Avni R, Nave M, Barad O, Baruch K, Twardziok SO, Gundlach H, Hale I, Mascher M,**  
525 **Spannagl M, Wiebe K, et al. 2017.** Wild emmer genome architecture and diversity  
526 elucidate wheat evolution and domestication. *Science* **357**: 93.
- 527 **Baker CR, Hanson-Smith V, Johnson AD. 2013.** Following gene duplication, paralog  
528 interference constrains transcriptional circuit evolution. *Science* **342**: 104-108.
- 529 **Beales J, Turner A, Griffiths S, Snape JW, Laurie DA. 2007.** A Pseudo-Response  
530 Regulator is misexpressed in the photoperiod insensitive Ppd-D1a mutant of wheat  
531 (*Triticum aestivum* L.). *Theoretical and Applied Genetics* **115**: 721-733.
- 532 **Birchler JA, Riddle NC, Auger DL, Veitia RA. 2005.** Dosage balance in gene regulation:  
533 biological implications. *Trends in Genetics* **21**: 219-226.
- 534 **Birchler JA, Veitia RA. 2007.** The Gene Balance Hypothesis: from classical genetics to  
535 modern genomics. *The Plant Cell* **19**: 395-402.
- 536 **Blanc G, Wolfe KH. 2004.** Functional divergence of duplicated genes formed by polyploidy  
537 during *Arabidopsis* evolution. *The Plant Cell* **16**: 1679-1691.
- 538 **Borrill P, Harrington SA, Simmonds J, Uauy C. 2019.** Identification of transcription  
539 factors regulating senescence in wheat through gene regulatory network modelling.  
540 *Plant Physiology* **180**: 1740-1755.
- 541 **Borrill P, Harrington SA, Uauy C. 2017.** Genome-wide sequence and expression analysis  
542 of the NAC transcription factor family in polyploid wheat. *G3:*  
543 *Genes/Genomes/Genetics* **7**: 3019-3029.
- 544 **Borrill P, Ramirez-Gonzalez R, Uauy C. 2016.** expVIP: a customizable RNA-seq data  
545 analysis and visualization platform. *Plant Physiology* **170**: 2172-2186.
- 546 **Buggs Richard JA, Chamala S, Wu W, Tate Jennifer A, Schnable Patrick S, Soltis**  
547 **Douglas E, Soltis Pamela S, Barbazuk WB. 2012.** Rapid, repeated, and clustered  
548 loss of duplicate genes in allopolyploid plant populations of independent origin.  
549 *Current Biology* **22**: 248-252.
- 550 **Chen A, Dubcovsky J. 2012.** Wheat TILLING mutants show that the vernalization gene  
551 *VRN1* down-regulates the flowering repressor *VRN2* in leaves but is not essential for  
552 flowering. *PLOS Genetics* **8**: e1003134.
- 553 **Choulet F, Alberti A, Theil S, Glover N, Barbe V, Daron J, Pingault L, Sourdille P,**  
554 **Couloux A, Paux E, et al. 2014.** Structural and functional partitioning of bread wheat  
555 chromosome 3B. *Science* **345**: 1249721.
- 556 **Conant GC, Birchler JA, Pires JC. 2014.** Dosage, duplication, and diploidization:  
557 clarifying the interplay of multiple models for duplicate gene evolution over time.  
558 *Current Opinion in Plant Biology* **19**: 91-98.
- 559 **Corey DM, Dunlap WP, Burke MJ. 1998.** Averaging correlations: expected values and bias  
560 in combined Pearson  $r$ s and Fisher's  $z$  transformations. *The Journal of General*  
561 *Psychology* **125**: 245-261.
- 562 **Cvijovic I, Good BH, Desai MM. 2018.** The effect of strong purifying selection on genetic  
563 diversity. *Genetics* **209**: 1235-1278.

- 564 **Danecek P, Auton A, Abecasis G, Albers CA, Banks E, DePristo MA, Handsaker RE,**  
565 **Lunter G, Marth GT, Sherry ST, et al. 2011.** The variant call format and VCFtools.  
566 *Bioinformatics* **27**: 2156-2158.
- 567 **Dubcovsky J, Dvorak J. 2007.** Genome plasticity a key factor in the success of polyploid  
568 wheat under domestication. *Science* **316**: 1862-1866.
- 569 **Feldman M, Levy AA. 2012.** Genome evolution due to allopolyploidization in wheat.  
570 *Genetics* **192**: 763-774.
- 571 **Force A, Lynch M, Pickett FB, Amores A, Yan YL, Postlethwait J. 1999.** Preservation of  
572 duplicate genes by complementary, degenerative mutations. *Genetics* **151**: 1531-1545.
- 573 **Freeling M. 2009.** Bias in plant gene content following different sorts of duplication:  
574 tandem, whole-genome, segmental, or by transposition. *Annual Review of Plant*  
575 *Biology* **60**: 433-453.
- 576 **Gao C. 2021.** Genome engineering for crop improvement and future agriculture. *Cell* **184**:  
577 1621-1635.
- 578 **Harrington SA, Backhaus AE, Singh A, Hassani-Pak K, Uauy C. 2020.** The wheat  
579 GENIE3 network provides biologically-relevant information in polyploid wheat. *G3:*  
580 *Genes/Genomes/Genetics* **10**: 3675-3686.
- 581 **He F, Pasam R, Shi F, Kant S, Keeble-Gagnere G, Kay P, Forrest K, Fritz A, Hucl P,**  
582 **Wiebe K, et al. 2019.** Exome sequencing highlights the role of wild-relative  
583 introgression in shaping the adaptive landscape of the wheat genome. *Nature Genetics*  
584 **51**: 896-904.
- 585 **Howe KL, Contreras-Moreira B, De Silva N, Maslen G, Akanni W, Allen J, Alvarez-**  
586 **Jarreta J, Barba M, Bolser DM, Cambell L, et al. 2020.** Ensembl Genomes 2020—  
587 enabling non-vertebrate genomic research. *Nucleic Acids Research* **48**: D689-D695.
- 588 **IWGSC. 2014.** A chromosome-based draft sequence of the hexaploid bread wheat (*Triticum*  
589 *aestivum*) genome. *Science* **345**: 1251788.
- 590 **IWGSC, Appels R, Eversole K, Stein N, Feuillet C, Keller B, Rogers J, Pozniak CJ,**  
591 **Choulet F, Distelfeld A, et al. 2018.** Shifting the limits in wheat research and  
592 breeding using a fully annotated reference genome. *Science* **361**: eaar7191.
- 593 **Juery C, Concia L, De Oliveira R, Papon N, Ramírez-González R, Benhamed M, Uauy**  
594 **C, Choulet F, Paux E. 2021.** New insights into homoeologous copy number  
595 variations in the hexaploid wheat genome. *The Plant Genome* **14**: e20069.
- 596 **Krasileva KV, Vasquez-Gross HA, Howell T, Bailey P, Paraiso F, Clissold L, Simmonds**  
597 **J, Ramirez-Gonzalez RH, Wang X, Borrill P, et al. 2017.** Uncovering hidden  
598 variation in polyploid wheat. *Proceedings of the National Academy of Sciences* **114**:  
599 E913-E921.
- 600 **Langfelder P, Horvath S. 2008.** WGCNA: an R package for weighted correlation network  
601 analysis. *BMC Bioinformatics* **9**: 559.
- 602 **Li Z, Defoort J, Tasdighian S, Maere S, Van de Peer Y, De Smet R. 2016.** Gene  
603 duplicability of core genes is highly consistent across all angiosperms. *The Plant Cell*  
604 **28**: 326-344.
- 605 **Liang Z, Schnable JC. 2018.** Functional divergence between subgenomes and gene pairs  
606 after whole genome duplications. *Molecular Plant* **11**: 388-397.
- 607 **Ling H-Q, Ma B, Shi X, Liu H, Dong L, Sun H, Cao Y, Gao Q, Zheng S, Li Y, et al.**  
608 **2018.** Genome sequence of the progenitor of wheat A subgenome *Triticum urartu*.  
609 *Nature* **557**: 424-428.
- 610 **Lloyd AH, Ranoux M, Vautrin S, Glover N, Fourment J, Charif D, Choulet F, Lassalle**  
611 **G, Marande W, Tran J, et al. 2014.** Meiotic gene evolution: can you teach a new  
612 dog new tricks? *Molecular Biology and Evolution* **31**: 1724-1727.

- 613 **Luo M-C, Gu YQ, Puiu D, Wang H, Twardziok SO, Deal KR, Huo N, Zhu T, Wang L,**  
614 **Wang Y, et al. 2017.** Genome sequence of the progenitor of the wheat D genome  
615 *Aegilops tauschii*. *Nature* **551**: 498-502.
- 616 **Lynch M, Conery JS. 2000.** The evolutionary fate and consequences of duplicate genes.  
617 *Science* **290**: 1151-1155.
- 618 **Maere S, De Bodt S, Raes J, Casneuf T, Van Montagu M, Kuiper M, Van de Peer Y.**  
619 **2005.** Modeling gene and genome duplications in eukaryotes. *Proceedings of the*  
620 *National Academy of Sciences* **102**: 5454-5459.
- 621 **Masiero S, Colombo L, Grini PE, Schnittger A, Kater MM. 2011.** The emerging  
622 importance of type I MADS box transcription factors for plant reproduction. *The*  
623 *Plant Cell* **23**: 865-872.
- 624 **McLaren W, Gil L, Hunt SE, Riat HS, Ritchie GR, Thormann A, Flicek P, Cunningham**  
625 **F. 2016.** The Ensembl Variant Effect Predictor. *Genome Biology* **17**: 122.
- 626 **Nam J, Kim J, Lee S, An G, Ma H, Nei M. 2004.** Type I MADS-box genes have  
627 experienced faster birth-and-death evolution than type II MADS-box genes in  
628 angiosperms. *Proceedings of the National Academy of Sciences* **101**: 1910-1915.
- 629 **Nowak MA, Boerlijst MC, Cooke J, Smith JM. 1997.** Evolution of genetic redundancy.  
630 *Nature* **388**: 167-171.
- 631 **Ohno S. 1970.** *Evolution by gene duplication*. Berlin Heidelberg: Springer.
- 632 **Panchy NL, Azodi CB, Winship EF, O'Malley RC, Shiu S-H. 2019.** Expression and  
633 regulatory asymmetry of retained *Arabidopsis thaliana* transcription factor genes  
634 derived from whole genome duplication. *BMC Evolutionary Biology* **19**: 77.
- 635 **Pophaly SD, Tellier A. 2015.** Population level purifying selection and gene expression shape  
636 subgenome evolution in maize. *Molecular Biology and Evolution* **32**: 3226-3235.
- 637 **Ramírez-González RH, Borrill P, Lang D, Harrington SA, Brinton J, Venturini L,**  
638 **Davey M, Jacobs J, van Ex F, Pasha A, et al. 2018.** The transcriptional landscape of  
639 polyploid wheat. *Science* **361**: eaar6089.
- 640 **Schilling S, Kennedy A, Pan S, Jermiin LS, Melzer R. 2020.** Genome-wide analysis of  
641 MIKC-type MADS-box genes in wheat: pervasive duplications, functional  
642 conservation and putative neofunctionalization. *New Phytologist* **225**: 511-529.
- 643 **Signorell Aema. 2021.** DescTools: tools for descriptive statistics. *R package version 0.99.44*  
644 <https://cran.r-project.org/package=DescTools>.
- 645 **Sim N-L, Kumar P, Hu J, Henikoff S, Schneider G, Ng PC. 2012.** SIFT web server:  
646 predicting effects of amino acid substitutions on proteins. *Nucleic Acids Research* **40**:  
647 W452-W457.
- 648 **Simons KJ, Fellers JP, Trick HN, Zhang Z, Tai Y-S, Gill BS, Faris JD. 2006.** Molecular  
649 characterization of the major wheat domestication gene *Q*. *Genetics* **172**: 547-555.
- 650 **Tasdighian S, Van Bel M, Li Z, Van de Peer Y, Carretero-Paulet L, Maere S. 2017.**  
651 Reciprocally retained genes in the angiosperm lineage show the hallmarks of dosage  
652 balance sensitivity. *The Plant Cell* **29**: 2766-2785.
- 653 **Van de Peer Y, Fawcett JA, Proost S, Sterck L, Vandepoele K. 2009a.** The flowering  
654 world: a tale of duplications. *Trends in Plant Science* **14**: 680-688.
- 655 **Van de Peer Y, Maere S, Meyer A. 2009b.** The evolutionary significance of ancient  
656 genome duplications. *Nature Reviews Genetics* **10**: 725-732.
- 657 **Wendel JF. 1989.** New World tetraploid cottons contain Old World cytoplasm. *Proceedings*  
658 *of the National Academy of Sciences* **86**: 4132-4136.
- 659 **Yan L, Loukoianov A, Tranquilli G, Helguera M, Fahima T, Dubcovsky J. 2003.**  
660 Positional cloning of the wheat vernalization gene *VRN1*. *Proceedings of the National*  
661 *Academy of Sciences* **100**: 6263-6268.

662 **Zhang H, Xie J, Wang W, Wang J. 2021.** Comparison of *Brassica* genomes reveals  
663 asymmetrical gene retention between functional groups of genes in recurrent  
664 polyploidizations. *Plant Molecular Biology* **106**: 193-206.  
665 **Zheng Y, Jiao C, Sun H, Rosli HG, Pombo MA, Zhang P, Banf M, Dai X, Martin GB,**  
666 **Giovannoni JJ, et al. 2016.** iTAK: A program for genome-wide prediction and  
667 classification of plant transcription factors, transcriptional regulators, and protein  
668 kinases. *Mol Plant* **9**: 1667-1670.

669

## 670 **Figure legends**

671 **Figure 1.** Transcription factor (TF) genes in *T. aestivum* and ancestral species. a) Percentage of genes  
672 annotated as TFs in hexaploid *T. aestivum* and the tetraploid and diploid ancestral species. b)  
673 Percentage of genes in triads in *T. aestivum* TF families with >10 triads and c) Percentage of genes in  
674 diads in *T. turgidum* ssp. *dicoccoides* TF families with >10 diads. In b) and c) the dotted black line  
675 indicates the mean value for non-transcription factors and asterisks (\*) denote families which are  
676 significantly different from non-TFs (Fisher's exact test,  $p < 0.05$ , FDR corrected for multiple testing).  
677 NS= non-significant. The fill colour of the dots indicates the number of genes in the TF family.

678

679 **Figure 2.** Factors explaining differential retention of homoeologs in different transcription factor (TF)  
680 families. a) Median expression level per TF family plotted against the percentage of the TF family in  
681 triads for TF families with >10 triads. The mean expression level of each gene in transcripts per  
682 million (tpm) was calculated using 15 tissues of Chinese Spring RNA-seq data and these gene level  
683 values were used to calculate median expression level within the TF family. b) The percentage of  
684 tandem duplicated genes within each TF family plotted against the percentage of the TF family in  
685 triads for TF families with >10 triads. TFs were considered to be tandem duplicates when they were  
686 up to  $\pm 3$  genes away from each other (i.e. up to two genes in between duplicates).

687

688 **Figure 3.** Co-expression of homoeologs within triads in transcription factor (TF) families with >10  
689 triads. a) Pearson's correlation coefficient between homoeologs across 15 tissues per TF family. TF  
690 families which were significantly different to non-TFs are highlighted in grey (Mann-Whitney test,  
691  $p < 0.05$ , FDR corrected for multiple testing). The correlation between non-TF homoeologs is shown in  
692 the top row. b) Homoeologs in same module in 850 sample WGCNA network per TF family. Black  
693 dotted line in b) represents mean value of non-TFs and asterisks (\*) denote families which are  
694 statistically significant different from non-TFs (Fisher's exact test,  $p < 0.05$ , FDR corrected for  
695 multiple testing). The fill colour of the dots in b) indicates the number of genes in the TF family.

696

697 **Figure 4.** Transcription factors (TFs) accumulate fewer harmful mutations than non-TFs. a)  
698 Mutational burden in TFs compared to non-TFs for different categories of variants in 811 individuals.  
699 Mutational burden was calculated as the number of homozygous mutations of each type per individual  
700 scaled by the total length of all canonical transcripts for TFs and non-TFs. The total number of  
701 polymorphic sites analysed for TFs and non-TFs were: stop gained (TF = 7, non-TF = 107),  
702 deleterious missense (TF = 125, non-TF = 2,277), tolerated missense (TF = 474, non-TF = 6,723),  
703 synonymous (TF = 414, non-TF = 5,989). \*\*\* indicates  $p < 0.001$  following a Tukey's test comparing  
704 the different classes of variants. b) The proportion of single nucleotide polymorphisms (SNPs) by  
705 variant effect in TF families containing  $> 10$  triads and  $\geq 5$  SNPs. These SNPs are in genes expressed  
706 in at least one tissue and have minor allele frequency  $\geq 0.01$ . The number of SNPs in each group is  
707 shown to the right of the bars. TF families are sorted according to the proportion of deleterious  
708 missense plus stop gained SNPs, and non-TFs are shown in the top row. The black dotted line  
709 represents the split between (synonymous + tolerated missense) and (deleterious missense + stop  
710 gained) SNPs in non-TFs.

711

## 712 **Supporting Information**

713 Table S1. Genes in *Triticum aestivum* (hexaploid wheat) assigned into transcription factor families  
714 and homoeologous groups.

715 Table S2. *Aegilops tauschii* genes in transcription factor families.

716 Table S3. *Triticum urartu* genes in transcription factor families.

717 Table S4. Genes in *Triticum turgidum* ssp. *diccoides* (tetraploid wheat) assigned into transcription  
718 factor families with homoeolog information.

719 Figure S1. Percentage of genes in triads in *Triticum aestivum* transcription factor (TF) families.

720 Figure S2. Percentage of genes in diads in *Triticum turgidum* ssp. *diccoides* transcription factor  
721 (TF) families.

722 Figure S3. Median expression level per TF family plotted against the percentage of the transcription  
723 factor (TF) family in triads.

724 Figure S4. Relationship between tandem duplication within each TF family and percentage of the  
725 transcription factor (TF) family in triads.

726 Figure S5. Pearson's correlation coefficient between homoeologs across 15 tissues per transcription  
727 factor (TF) family.



728 Figure S6. Homoeologs in same module in 850 sample WGCNA network per transcription factor (TF)  
729 family.

730 Figure S7. Distribution of per-site nucleotide diversity ( $\pi$ ) for transcription factors (TF) and  
731 background genes (non-TF).

732 Figure S8. Association between per-site nucleotide diversity ( $\pi$ ) and allele frequency for transcription  
733 factors (TF) and background genes (non-TF).
